# Supplementary material
Source: publisher figshare collection journal article supplement (https://acs.figshare.com/ndownloader/files/14946197)
Supplement: Supplementary file 1 [file 14946197]

## **Supporting information**

### **A Facile Method to Synthesize Pt-Ni Octahedral Nanoparticles with Porous and Open-Structure Features for Enhanced Oxygen Reduction Catalysis**

Zheng Jiang, Yang Liu, Lei Huang, Wen Hao Gong and Pei Kang Shen\*

*Collaborative Innovation Center of Renewable Energy Materials, Guangxi Key*

*Laboratory of Electrochemical Energy Materials, College of Chemistry and Chemical*

*Engineering, State Key Laboratory of Processing for Non-Ferrous Metal and*

*Featured Materials, Guangxi University, Nanning 530004, P. R. China*

**Number of pages: 16**

**Number of tables: 1**

**Number of figures: 12**

## Table of Contents

### Experimental Details

**Figure S1.** XRD patterns of CON, PON and TON.

**Figure S2.** The line scanning image of CON for four different scanning directions.

**Figure S3.** TEM images of the nanocrystals obtained by using different surfactants.

**Figure S4.** The EDS spectrum of CON. The EDS spectrum of PON. The EDS spectrum of TON.

**Figure S5.** TEM images of the nanocrystals after hydrochloric acid etched (1h, at 100 °C ). The cores of particles in the center are visible and octahedral structure is warped. STEM image of the nanocrystals after hydrochloric acid etched.

**Figure S6.** Structure analysis of TON.

**Figure S7.** The histograms for particle size distribution.

**Figure S8:** The SEM image of CON.

**Figure S9.** TEM images of the nanocrystals obtained by using different precursors.

**Figure S10.** TEM images of the nanocrystals obtained by using different reductant.

**Table S1:** The electrochemical performance and durability of different catalysts for oxygen reduction reaction.

**Figure S11.** Electrochemical durability of Pt/C catalyst and PON nanocrystals.

**Figure S12.** The EDS image of PON, TON after ADT test. The TEM image of PON and TON after ADT test.

**Experimental Details:**

**Chemicals:** Chloroplatinic acid hexahydrate ( $\text{H}_2\text{PtCl}_6 \cdot 6\text{H}_2\text{O}$ ), nickel acetylacetonate ( $\text{Ni}(\text{acac})_2$ , 95%), N, N-dimethylformamide (DMF, 99.9%), cetyltrimethyl ammonium chloride (CTAC, 97% ), acetic acid (95%) and polyvinylpyrrolidone K30 (PVP) were purchased from Aladdin. All chemicals were used as received without further purification. The water used in all experiments was ultrapure (18.2 M $\Omega$ ). Solvents such as ethanol and hexane were analytical grade and used as received without further purification.

**Synthesis of co-deposition Pt-Ni nanoparticle (CON):** 160 mg CTAC, 100mg PVP and 35mg  $\text{Ni}(\text{acac})_2$  were added into the 25mL Teflon-lined autoclave containing 10 mL DMF, Mixed solution in the autoclave was stirred for 10 min at 25 °C, then 13.3mg  $\text{H}_2\text{PtCl}_6 \cdot 6\text{H}_2\text{O}$  was added. The autoclave was sealed in a stainless steel and transferred into an oil bath with the temperature holding at 160 °C and moderate magnetic stirring. After 12h, autoclave was cooled down to room temperature naturally. The products were collected using alcohol via centrifugation (5000rpm for 5 min).

**Synthesis of porous octahedral Pt-Ni nanoparticle (PON):** The PON was made from a CON by etching the Ni component by acetic acid. The as-obtained CON was dispersed into 10 mL acetic acid. After sonication (100 W) for 3h at 80 °C, the product was collected by centrifugation, washed with ethanol and dispersed in hexane for further use.

**Synthesis of tiny octahedral Pt-Ni nanoparticle (TON):** 150 mg CTAC, 80mg PVP and 7mg  $\text{Ni}(\text{acac})_2$  were added into the 25mL Teflon-lined autoclave containing 10 mL

DMF, the mixed solution in the autoclave was stirred for 10 min at 25°C, then 13.3mg  $\text{H}_2\text{PtCl}_6 \cdot 6\text{H}_2\text{O}$  was added. The autoclave was sealed in a stainless steel and transferred into an oil bath with the temperature holding at 160 °C and moderate magnetic stirring. After 8h, autoclave was cooled down to room temperature naturally. The products were collected using alcohol via centrifugation (5000rpm for 5 min).

**Materials Characterizations:** The X-ray diffraction (XRD) measurements were collected on a SmartLab 3 X-ray diffractometer (Rigaku, Japan), with Cu K $\alpha$  radiation ( $\lambda = 1.5405 \text{ \AA}$ ) at 40 KV and 30mA. The  $2\theta$  angular regions were from 10° to 90° which were finely scanned at 5° min<sup>-1</sup>. TEM images were performed on TITAN G2 (FEI, American) microscope at 120 KV. High resolution-TEM, high angle annular dark field scanning transmission electron microscope (HAADF-STEM) and EDS mapping images were performed using TITAN G2 60-300 equipped with image corrector and highly sensitive Super-X energy dispersive X-ray (EDS) detector system. The samples for TEM characterizations were prepared by dropping ethyl alcohol dispersion of nanocrystals onto carbon-coated Cu grids and immediately evaporating the solvent. The concentration of catalysts was determined by the inductively coupled plasma atomic emission spectroscopy (TJA RADIAL IRIS 1000 ICP-AES, USA).

**Electrochemical study:** The as-obtained Pt-Ni nanoparticles were dispersed on the commercial carbon support (Cabot, Vulcan-72). The organic surfactants were removed by n-butylamine and annealing in air at 200 °C for 1h. The commercial Pt/C catalyst (TKK, Japan) was used for comparison. The catalyst ink was prepared by mixing carbon supported catalysts in 2 mL of solution containing 1.8 mL of ethanol and 200

$\mu\text{L}$  of 0.5 wt. % Nafion solution followed by ultrasonication for 30 min. A certain amount of catalyst suspension was pipetted onto the clean glassy carbon surface with a micropipette and dried to form a uniform thin film which was further characterized in electrochemical cell. The Pt loadings for electrocatalysts were normalized over the geometric electrode area of  $0.196\text{ cm}^2$  and determined by ICP-AES. The Pt loadings were  $10.7\text{ }\mu\text{g cm}^{-2}$ ,  $14.28\text{ }\mu\text{g cm}^{-2}$  and  $17.8\text{ }\mu\text{g cm}^{-2}$  for PON, TON and TKK-Pt/C respectively.

The electrochemical measurements were conducted in a three-compartment electrochemical cell with a Pine rotational ring-disk electrode (RRDE) setup connected with a biopotentiostat (AFCBP1E, Pine Instrument Co., USA), glassy carbon covered with thin catalyst film acts as a working electrode, reversible hydrogen electrode (RHE) as a reference electrode and Pt flag as a counter electrode. The CV curves were recorded in  $\text{N}_2$ -saturated  $0.1\text{ M HClO}_4$  solution with scan rate of  $50\text{ mV s}^{-1}$ . The ORR polarization curves were collected in  $\text{O}_2$ -saturated  $0.1\text{ M HClO}_4$  solution at 1600 rpm with a scan rate of  $10\text{ mV s}^{-1}$ . The accelerated durability tests (ADTs) were performed in  $\text{O}_2$ -saturated  $0.1\text{ M HClO}_4$  solutions by applying cyclic potential sweeps between 0.6 and 1.0 V versus RHE at a sweep rate of  $100\text{ mV s}^{-1}$  for 6,000 cycles.

**Computational Details.** DFT calculations were performed on the Dmol<sup>3</sup> program package. The exchanged and correlated interaction were presented by Generalized gradient approximation (GGA) with Perdew-Burke-Ernzerhof (PBE) function. Spin-polarized was unrestricted for all calculations. Double numerical plus polarization (DNP) basis set was employed and its accuracies equaled to Pope's 6-31G\*\* basis set.

Three calculated models were the octahedron consisting of 114 Ni atoms and 1 Pt atom (at vertex, edge and surface). The total energy of the three octahedrons and The PDOS of Pt 5d electrons were calculated respectively. The k-point sampling of Brillouin zone was obtained with a  $3\times3\times3$  grid mesh using Monkhorst-Pack method. The convergence criterion of energy lower than 10 Ha, 0.002 Ha/Å of maximum force, and 0.005 Å of maximum displacement were used for all structure geometry optimization.

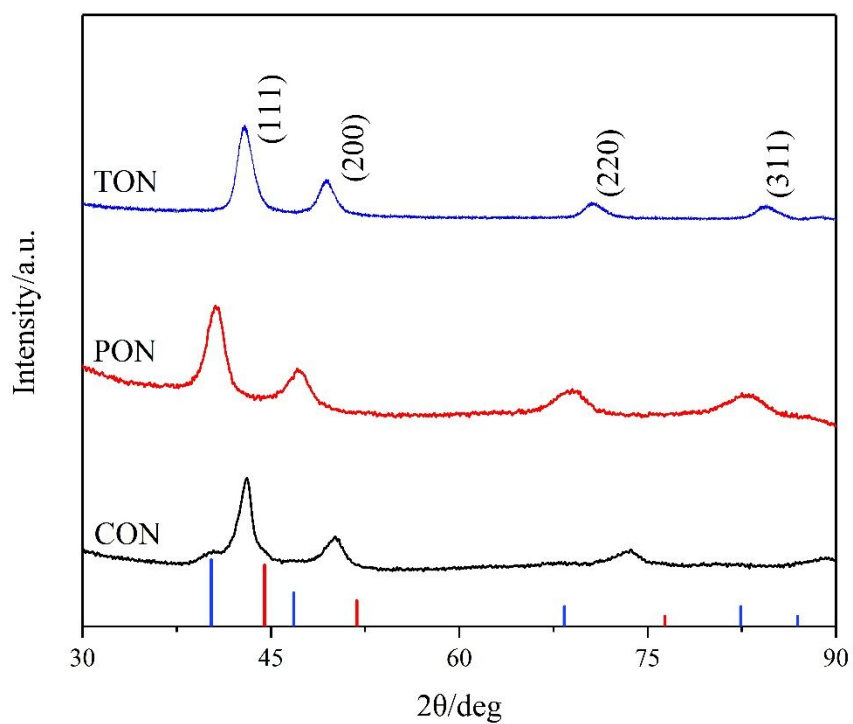

**Figure S1:** XRD patterns of CON, PON and TON. Color sticks indicate the reference X-ray diffraction lines: blue, Pt (PDF#87-0647), and red, Ni (PDF#87-0712).

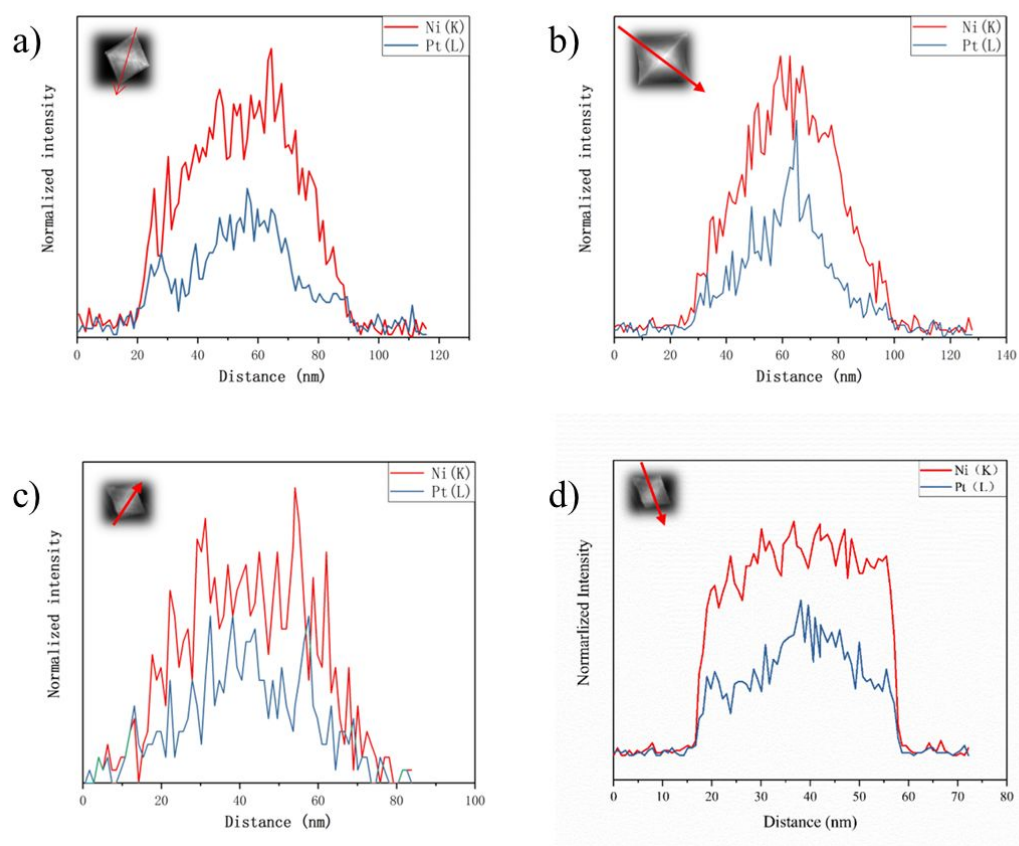

**Figure S2:** The line scanning image of CON for four different scanning directions.



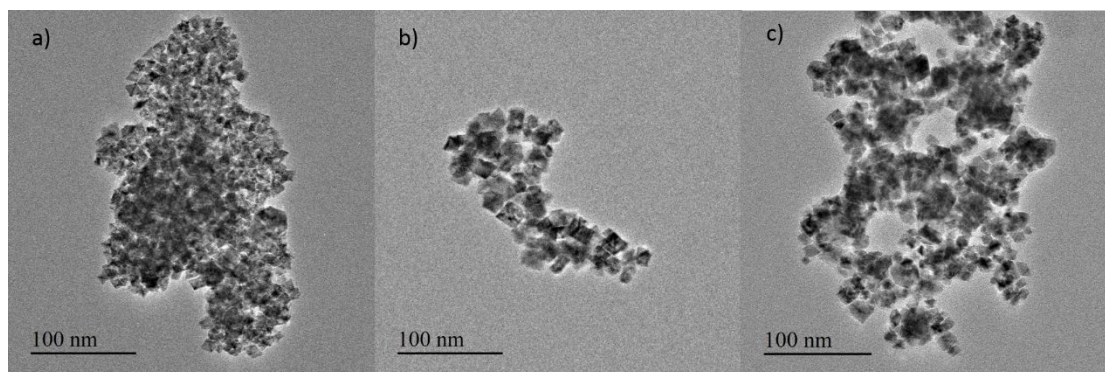

**Figure S3:** TEM images of the nanocrystals obtained by using different surfactants:(a) without any surfactants, (b) 160mg CTAC but without PVP, (c) 100mg PVP but without CTAC.

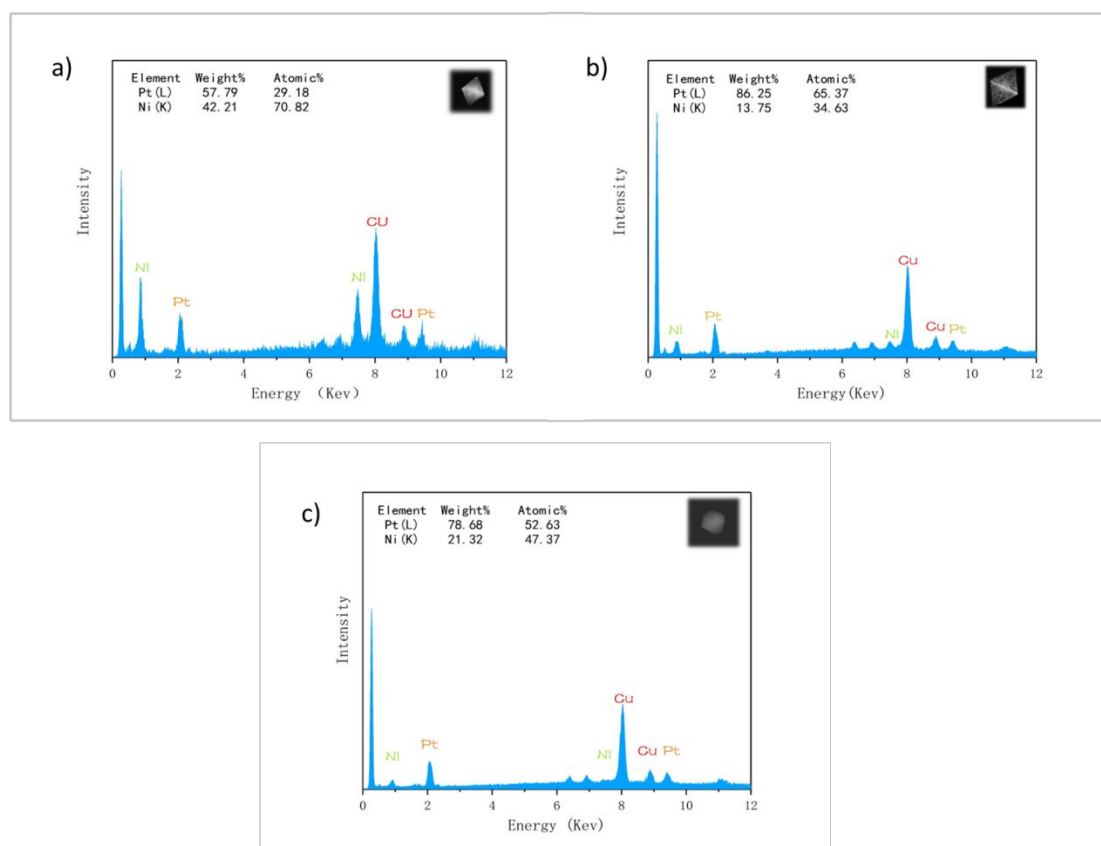

**Figure S4:** (a) The EDS spectrum of CON. (b) The EDS spectrum of PON. (c) The EDS spectrum of TON.

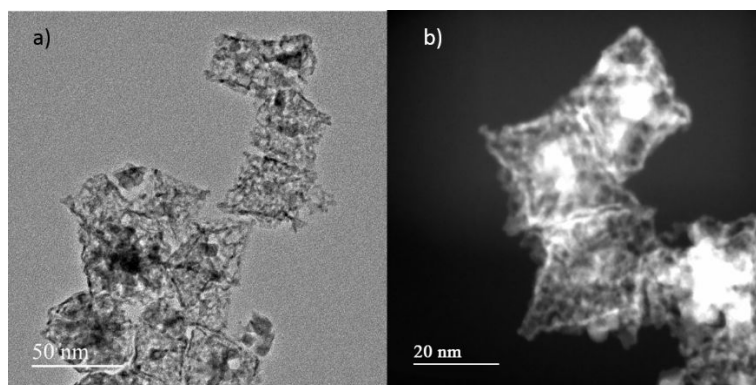

**Figure S5:** (a) TEM images of the nanocrystals after hydrochloric acid etched (1h, at 100 °C ). The cores of particles in the center are visible and octahedral structure is warped. (b) STEM image of the nanocrystals after hydrochloric acid etched.

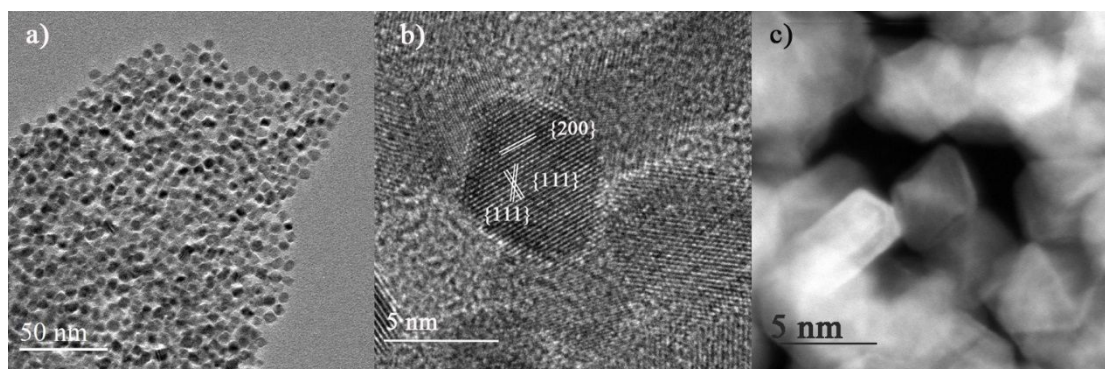

**Figure S6:** Structure analysis of TON. (a) TEM image of TON. (b) HRTEM image of a TON. (c) STEM image of TON.

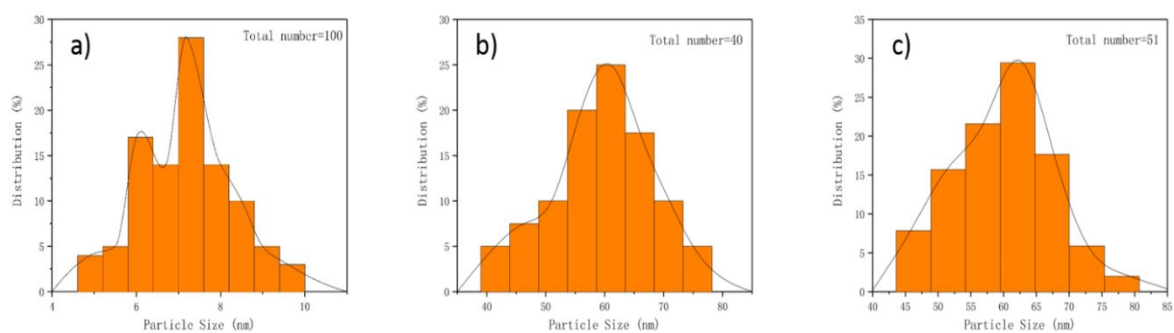

**Figure S7:** The histograms for particle size distribution. (a) TON, (b) CON, (c) PON.

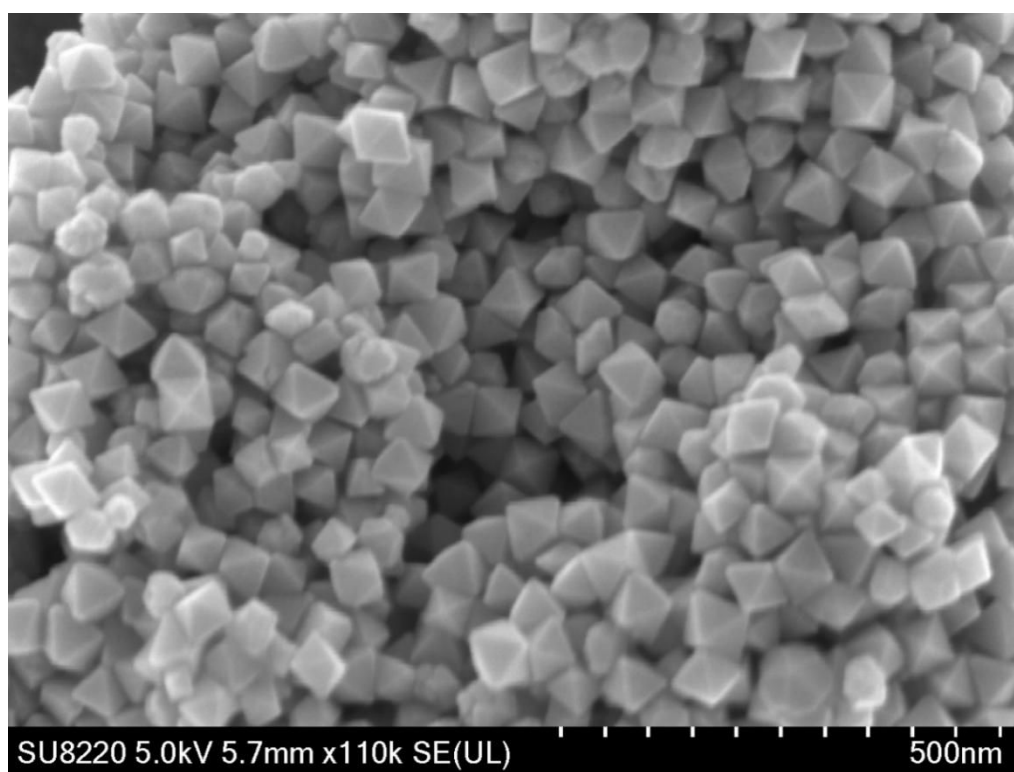

**Figure S8:** The SEM image of CON.

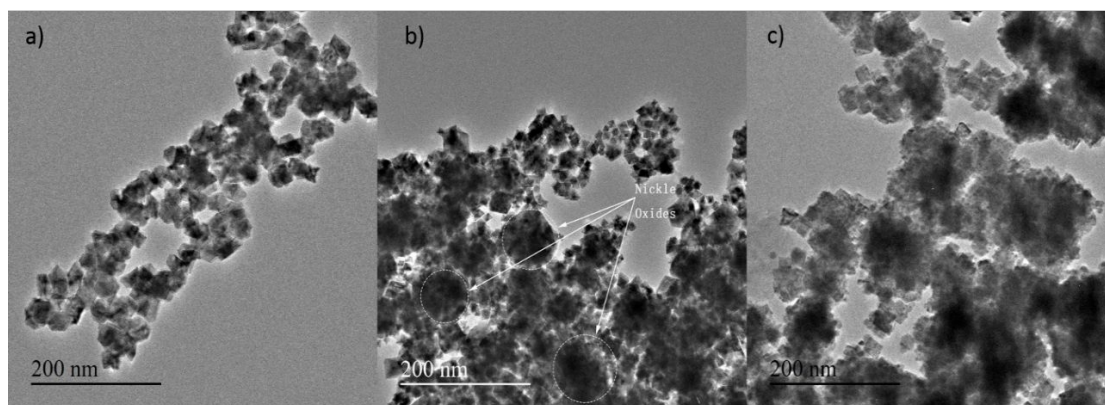

**Figure S9:** TEM images of the nanocrystals obtained by using different precursors: (a)  $\text{Pt}(\text{acac})_2$  and  $\text{Ni}(\text{acac})_2$ , (b):  $\text{H}_2\text{PtCl}_6(\text{aq})$  and  $\text{Ni}(\text{acac})_2$ , (c):  $\text{H}_2\text{PtCl}_6(\text{aq})$  and  $\text{NiCl}_2$ . (b) and (c) suggest that water in this synthesis system would lead to the formation of nickel oxides.

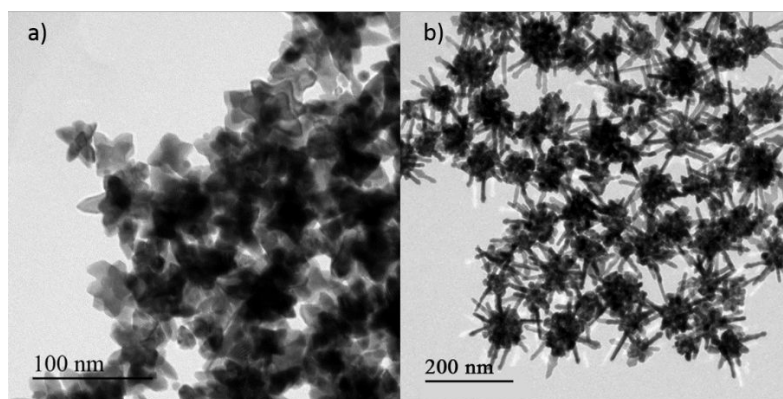

**Figure S10:** TEM images of the nanocrystals obtained by using different reductant. (a) 10mL Triethylene glycol, (b) 10mL oleylamine.

**Table S1:** The electrochemical performance and durability of different catalysts for oxygen reduction reaction.

| Catalysts                                                        | Mass activity<br>(A mg <sub>Pt</sub> <sup>-1</sup> ) | Specific activity<br>(mA cm <sup>-2</sup> ) | ADT<br>(cycles) | ECSA loss<br>ratio (%) | Ref            |
|------------------------------------------------------------------|------------------------------------------------------|---------------------------------------------|-----------------|------------------------|----------------|
| Pt-Ni<br>nanoframe                                               | 0.32                                                 | 0.55                                        |                 |                        | Ref.14 in text |
|                                                                  | 0.94                                                 | 2.8                                         |                 |                        | Ref.15 in text |
| Pt-Ni<br>nanoparticle                                            | 2.1                                                  | 3.8                                         | 4,000           | 8                      | Ref.1          |
|                                                                  |                                                      | 1.09                                        |                 |                        | Ref.2          |
|                                                                  | 0.81                                                 | 2.13                                        |                 |                        | Ref.3          |
| Pt-Ni porous<br>dendritic<br>nanocrystals                        | 0.757                                                | 1.0006                                      | 6,000           | 27.3                   | Ref.4          |
|                                                                  | 0.93                                                 | 1.76                                        | 1,0000          | 7                      | Ref.5          |
| Tiny Pt-Ni<br>octahedral<br>nanoparticle                         | 0.573                                                | 1.82                                        | 6,000           | 27.8                   | This work      |
| Porous and<br>open-structure<br>octahedral Pt-Ni<br>nanoparticle | 0.914                                                | 2.45                                        | 6,000           | 18.1                   | This work      |



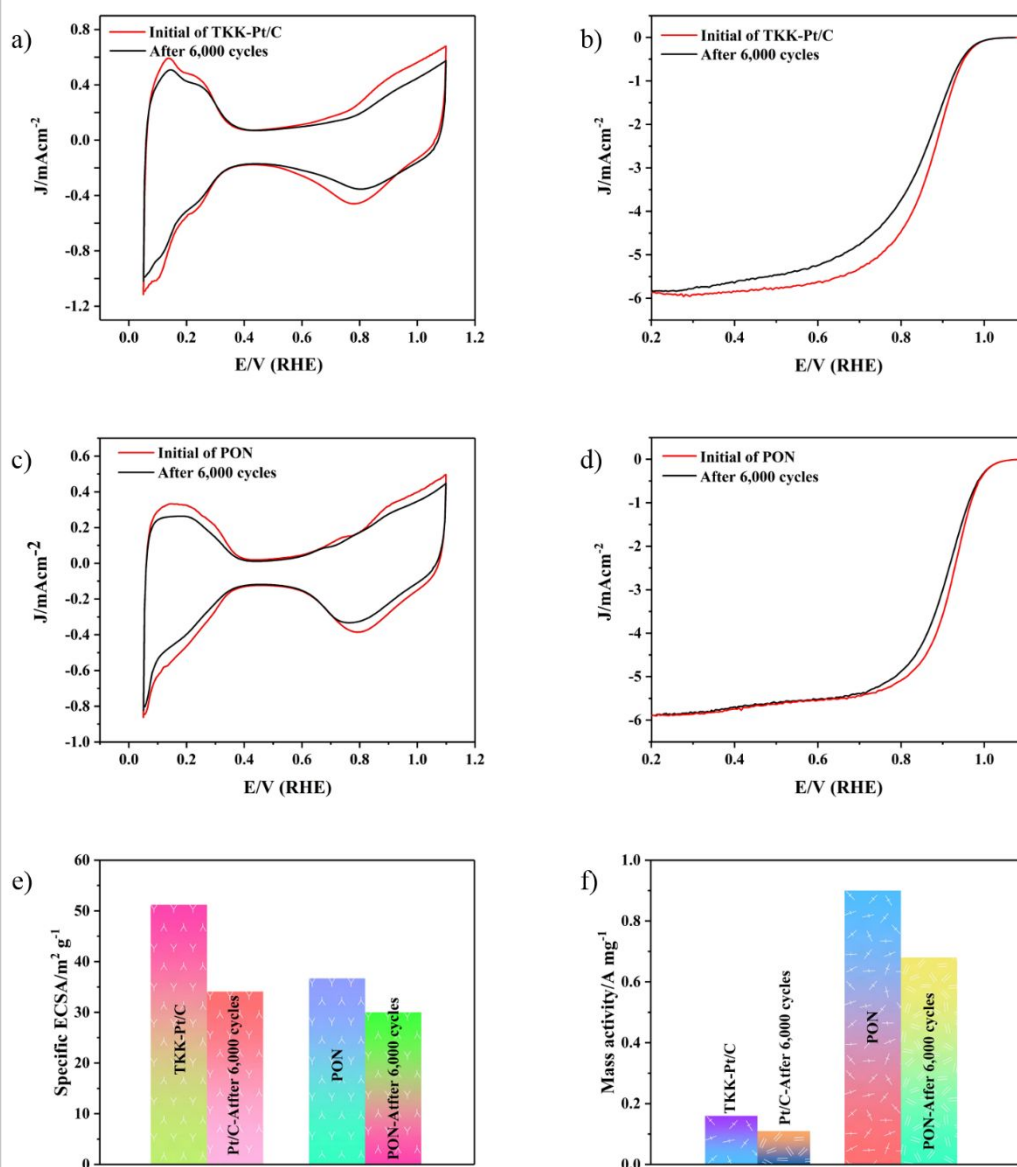

**Figure S11:** Electrochemical durability of Pt/C catalyst and PON nanocrystals. Cyclic voltammetry (CV) Curves for (a) Pt/C catalyst and (c) PON nanocrystals after prolonged cycles of CV. ORR polarization curves for (b) Pt/C catalyst and (d) PON nanocrystals, initial (black line) and after (red line) 6,000 potential sweep cycles between 0.6 and 1.1 V in an  $\text{O}_2$ -saturated 0.1 M  $\text{HClO}_4$  solution at 100 mV/s. (e) and (f) The comparison of ECSA and mass activity of PON and TKK-Pt/C catalyst before and after 6,000 cycles.

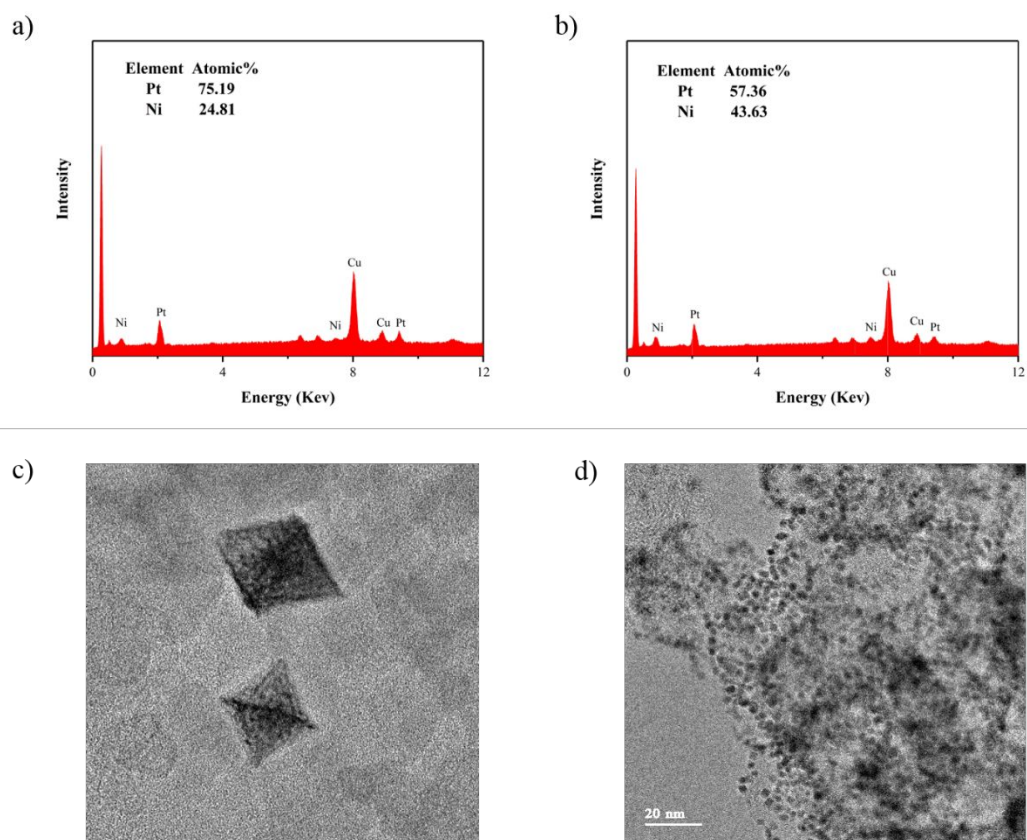

**Figure 12:** The EDS image of (a) PON, (b) TON after ADT test. The TEM image of (c) PON and (d) TON after ADT test.

## Reference:

- (1) Changlin, Z.; Youp, H. S.; Alexis, T.; Zhenmeng, P., Solid-state chemistry-enabled scalable production of octahedral Pt-Ni alloy electrocatalyst for oxygen reduction reaction. *Journal of the American Chemical Society* **2014**, *136*, 7805-8.
- (2) Xu, X.; Zhang, X.; Sun, H.; Yang, Y.; Dai, X.; Gao, J.; Li, X.; Zhang, P.; Wang, H. H.; Yu, N. F.; Sun, S. G. Synthesis of Pt-Ni alloy nanocrystals with high-index facets and enhanced electrocatalytic properties. *Angew. Chem. Int. Ed. Engl.* **2014**, *53*, 12522-7.
- (3) Chang, Q.; Yuan, X. U.; Zhu, S.; Xiao, F.; Shao, M. Pt-Ni nanourchins as electrocatalysts for oxygen reduction reaction. *Front. Energy* **2017**, *11*, 254-259.
- (4) Huang, X.; Zhu, E.; Chen, Y.; Li, Y.; Chiu, C. Y.; Xu, Y.; Lin, Z.; Duan, X.; Huang, Y. A facile strategy to Pt<sub>3</sub>Ni nanocrystals with highly porous features as an enhanced oxygen reduction reaction catalyst. *Adv. Mater.* **2013**, *25*, 2974-9.
- (5) Eid, K.; Wang, H.; Malgras, V.; Alothman, Z. A.; Yamauchi, Y.; Wang, L. Facile Synthesis of Porous Dendritic Bimetallic Platinum–Nickel Nanocrystals as Efficient Catalysts for the Oxygen Reduction Reaction. *Chem. Asian J.* **2016**, *11*, 1388-1393.
